# Supplementary material for: TWIST1-MicroRNA-10a-MAP3K7 Axis Ameliorates Synovitis of Osteoarthritis in Fibroblast-like Synoviocytes
Source: PubMed Central journal article supplement — Mol Ther Nucleic Acids. 2020 Oct 22;22:1107–20. doi: 10.1016/j.omtn.2020.10.020 (PMC7691159; doi:10.1016/j.omtn.2020.10.020), 2020-10-22
Supplement: mmc1.pdf [file mmc1.pdf]

**OMTN, Volume 22**

**Supplemental Information**

**TWIST1-MicroRNA-10a-MAP3K7 Axis**

**Ameliorates Synovitis of Osteoarthritis**

**in Fibroblast-like Synoviocytes**

**Jiajie Tu, Wei Huang, Weiwei Zhang, Jiawei Mei, Zhiying Yu, and Chen Zhu**

Supplementary figures

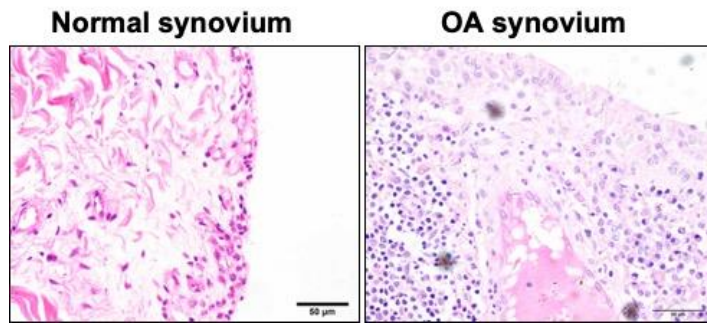

Figure S1. H&E staining of normal and OA synovium

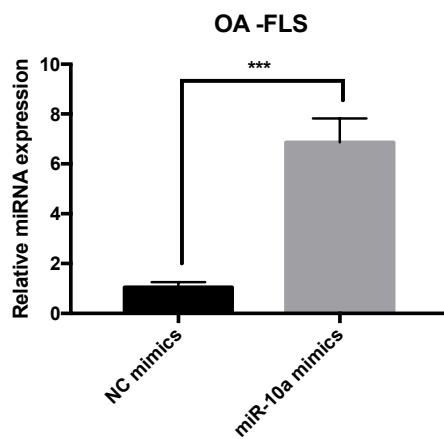

Figure S2. A significant up-regulation of miR-10a expression was detected by qRT-PCR in OA-FLS. Data represent means  $\pm$  SEM (n=3); \*\*\*p < 0.001 determined by the Student's t-test.

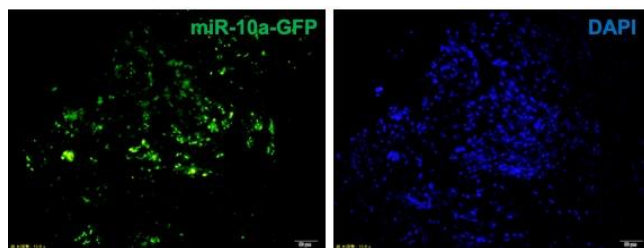

Figure S3. The transfection efficiency of miR-10a lentivirus in the transplanted synovium.

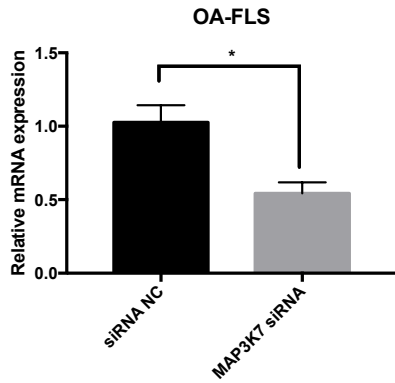

Figure S4. siRNA was used to knockdown the expression of MAP3K7. Data represent means  $\pm$  SEM (n=3); \*p < 0.05 determined by the Student's t-test.

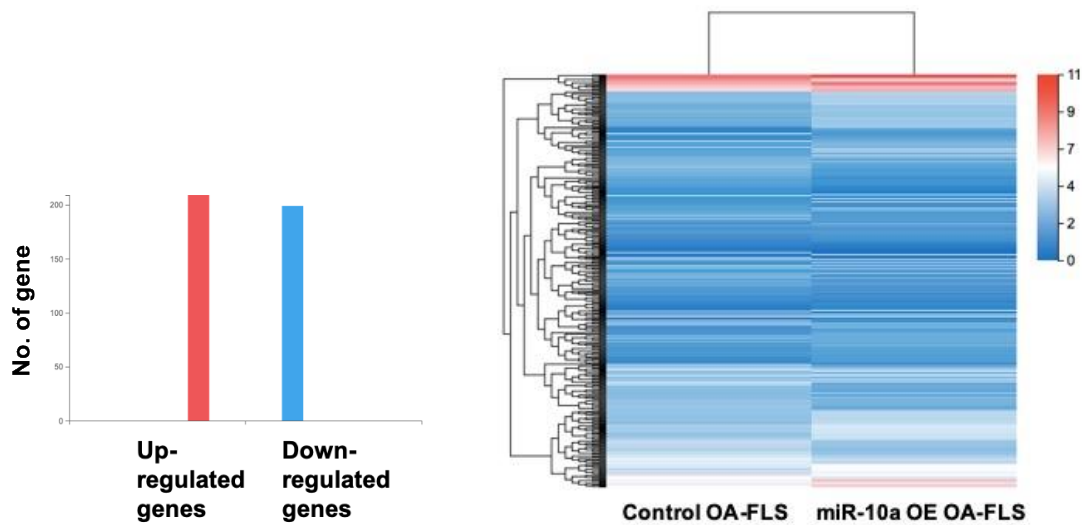

Figure S5. The transcriptomes of miR-10a-overexpressing OA-FLS and control OA-FLS by RNA-seq (The up- and down-regulated genes by miR-10a in OA-FLS were listed as a supplementary excel table).

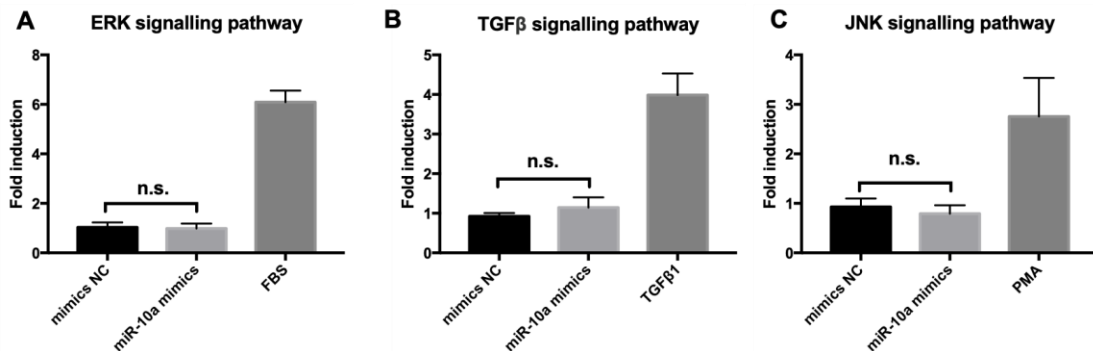

Figure S6. miR-10a didn't affect (A) ERK (B)TGF $\beta$ , or (C) JNK pathway in OA-FLS. Data represent means  $\pm$  SEM (n=3); n.s. p > 0.05 determined by the Student's t-test.

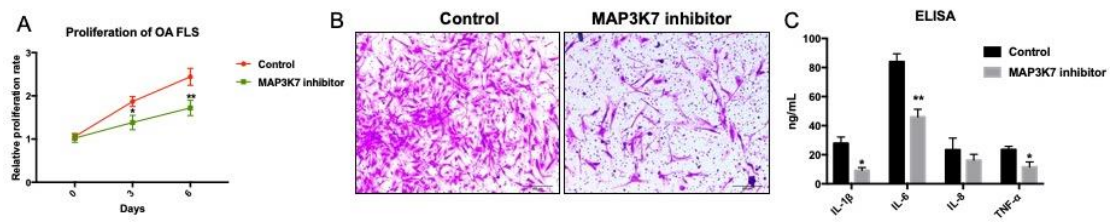

Figure S7. The effects of specific MAP3K7 inhibitor (Takinib) on (A) proliferation, (B) migration and (C) production of pro-inflammatory cytokines of OA-FLS. Data represent means  $\pm$  SEM (n=3); \*p < 0.05 and \*\*p < 0.01 determined by the Student's t-test.

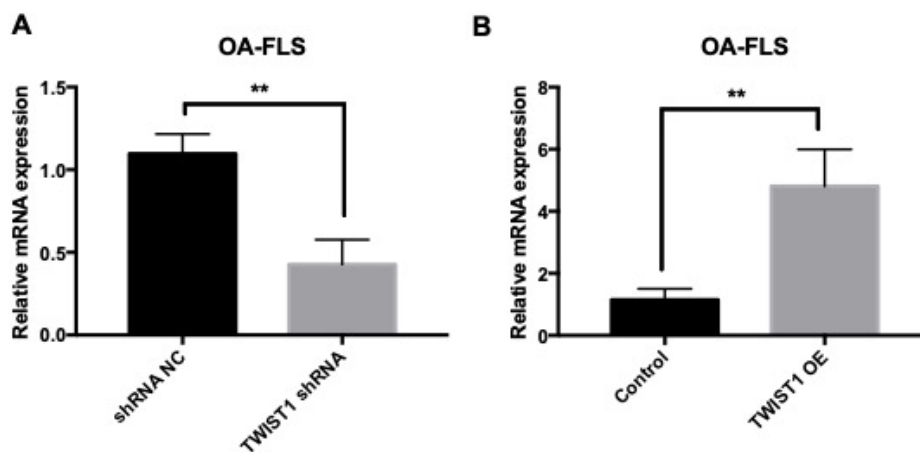

Figure S8. The knockdown and overexpression of TWIST1 in OA-FLS. Data represent means  $\pm$  SEM (n=3); \*p < 0.05 determined by the Student's t-test.

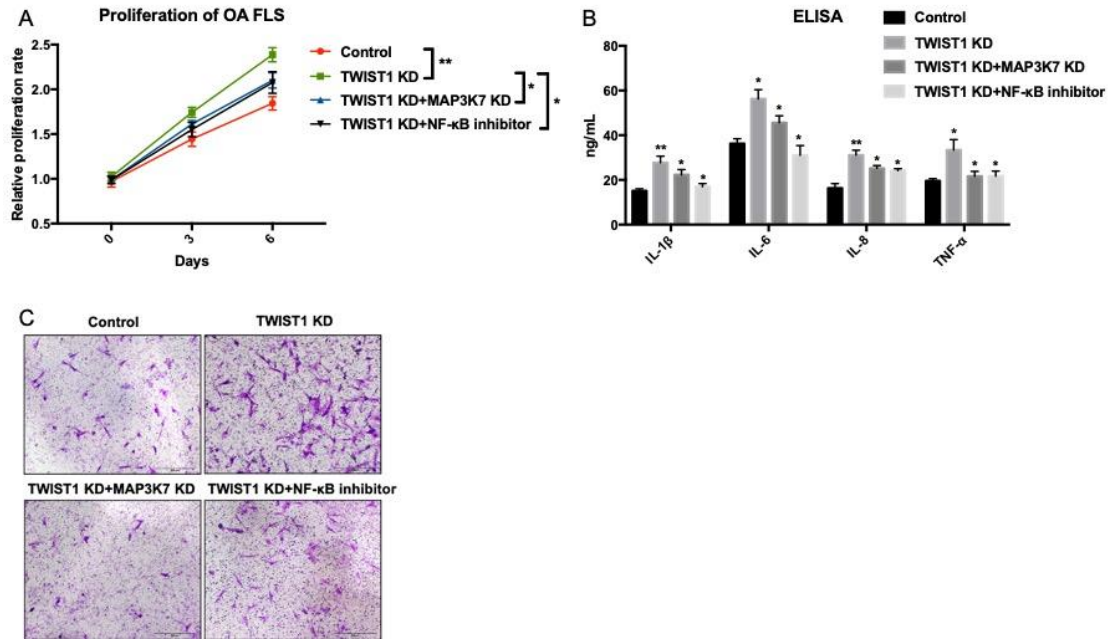

Figure S9. Blockage of MAP3K7 or NF- $\kappa$ B could reverse the TWIST1 knockdown-induced pro-inflammatory effects, including proliferation (A), production of inflammatory cytokines (B) and migration (C), in OA-FLS. Data represent means  $\pm$  SEM (n=3); \*p < 0.05 determined by the Student's t-test.

#### qPCR Primer list

ACAN forward primer: TCCCCTGCTATTTTCATCGAC

ACAN reverse primer: CCAGCAGCACTACCTCCTTC

$\alpha$ -SMA forward primer: GGAATCCTGTGAAGCAGCTC

$\alpha$ -SMA reverse primer: ACAATGGATGGGAAAACAGC

COL2A1 forward primer: CAGGACCAAAGGGACAGAAA

COL2A1 reverse primer: TTTCACCTTTGTCACCACGA

MMP2 forward primer: ACCCAGATGTGGCCAACTAC

MMP2 reverse primer: GAGCAAAGGCATCATCCACT

MMP3 forward primer: GAAGCTGGACTCCGACACTC

MMP3 reverse primer: AAGGTGGGTTTTTCCTCCACT

MMP9 forward primer: CATCGTCATCCAGTTTGGTG

MMP9 reverse primer: AGGGACCACAACCTCGTCATC

MMP13 forward primer: TTGAGCTGGACTCATTGTCG

MMP13 reverse primer: CGCGAGATTTGTAGGATGGT

ADAMTS4 forward primer: CTGCAGTACCAGTGCCATGT

ADAMTS4 reverse primer: AGAGAGGCCAGCAGTAGCAG

ADAMTS5 forward primer: ACCTCTTTCTGGAGCACGAA

ADAMTS5 reverse primer: CACACACTTGCTTGCAGGAT
